RESEARCH ARTICLE

# Modulation of Cell Metabolic Pathways and Oxidative Stress Signaling Contribute to Acquired Melphalan Resistance in Multiple Myeloma Cells

Kamila Anna Zub<sup>1</sup>, Mirta Mittelstedt Leal de Sousa<sup>1</sup>, Antonio Sarno<sup>1</sup>, Animesh Sharma<sup>1,2</sup>, Aida Demirovic<sup>1</sup>, Shalini Rao<sup>1</sup>, Clifford Young<sup>3a</sup>, Per Arne Aas<sup>1</sup>, Ida Ericsson<sup>1</sup>, Anders Sundan<sup>1</sup>, Ole Nørregaard Jensen<sup>3</sup>, Geir Slupphaug<sup>1,2\*</sup>

**1** Department of Cancer Research and Molecular Medicine, Norwegian University of Science and Technology NTNU, Trondheim, Norway, **2** PROMEC Core Facility for Proteomics and Metabolomics, Norwegian University of Science and Technology NTNU, Trondheim, Norway, **3** Department of Biochemistry and Molecular Biology, University of Southern Denmark, Odense, Denmark

✉ Current address: Department of Proteomics, The Novo Nordisk Foundation Center for Protein Research, University of Copenhagen, Copenhagen, Denmark

\* [geir.slupphaug@ntnu.no](mailto:geir.slupphaug@ntnu.no)

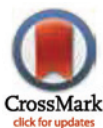

OPEN ACCESS

**Citation:** Zub KA, Sousa MMLd, Sarno A, Sharma A, Demirovic A, Rao S, et al. (2015) Modulation of Cell Metabolic Pathways and Oxidative Stress Signaling Contribute to Acquired Melphalan Resistance in Multiple Myeloma Cells. *PLoS ONE* 10(3): e0119857. doi:10.1371/journal.pone.0119857

**Academic Editor:** Ming Tan, University of South Alabama, UNITED STATES

**Received:** September 23, 2014

**Accepted:** January 16, 2015

**Published:** March 13, 2015

**Copyright:** © 2015 Zub et al. This is an open access article distributed under the terms of the [Creative Commons Attribution License](https://creativecommons.org/licenses/by/4.0/), which permits unrestricted use, distribution, and reproduction in any medium, provided the original author and source are credited.

**Data Availability Statement:** The proteomics data have been deposited to the ProteomeXchange Consortium via the PRIDE partner repository with the identifier PXD001276 (<http://www.ebi.ac.uk/pride/archive/projects/PXD001276>) The transcriptomic data have been deposited to the GEO repository with the identifier GSE60970 (<http://www.ncbi.nlm.nih.gov/geo/query/acc.cgi?acc=GSE60970>).

**Funding:** Funding was provided by the Research Council of Norway ([http://www.forskningssradet.no/en/Home\\_page/1177315753906](http://www.forskningssradet.no/en/Home_page/1177315753906)), grant no. 183423 and 183432; the Norwegian Cancer Society (<https://>

## Abstract

Alkylating agents are widely used chemotherapeutics in the treatment of many cancers, including leukemia, lymphoma, multiple myeloma, sarcoma, lung, breast and ovarian cancer. Melphalan is the most commonly used chemotherapeutic agent against multiple myeloma. However, despite a 70–80% initial response rate, virtually all patients eventually relapse due to the emergence of drug-resistant tumour cells. By using global proteomic and transcriptomic profiling on melphalan sensitive and resistant RPMI8226 cell lines followed by functional assays, we discovered changes in cellular processes and pathways not previously associated with melphalan resistance in multiple myeloma cells, including a metabolic switch conforming to the Warburg effect (aerobic glycolysis), and an elevated oxidative stress response mediated by VEGF/IL8-signaling. In addition, up-regulated aldo-keto reductase levels of the AKR1C family involved in prostaglandin synthesis contribute to the resistant phenotype. Finally, selected metabolic and oxidative stress response enzymes were targeted by inhibitors, several of which displayed a selective cytotoxicity against the melphalan-resistant cells and should be further explored to elucidate their potential to overcome melphalan resistance.

## Introduction

Multiple myeloma (MM) is an incurable bone marrow disease and the second most common hematological cancer. The median age of onset is 65 years and progression often leads to severe complications including immunodeficiency, osteolytic bone disease and renal failure [1].

[kreffforeningen.no/en/](http://kreffforeningen.no/en/)), grant no. TS-02-2008-0185; the Cancer Fund at St. Olavs Hospital, Trondheim (<http://www.stolav.no/en/>), grant no. 47063403; the Liaison Committee between the Central Norway Regional Health Authority (RHA) and the Norwegian University of Science and Technology (NTNU) (<http://www.ntnu.no/dmfi/rad/samorg/>), grant no. 81133200. The funders had no role in study design, data collection and analysis, decision to publish, or preparation of the manuscript.

**Competing Interests:** The authors have declared that no competing interests exist.

Although current therapies may improve the patient's survival, disease progression and acquired drug resistance remain unsolved issues. Since the 1960s, the alkylating drug melphalan (L-phenylalanine mustard) has been employed in combination with corticosteroids as first-line therapy for MM [2]. Novel agents such as bortezomib and lenalidomide have recently been introduced, but melphalan remains the standard therapy for transplant-ineligible patients and is the basis for high-dose therapy associated with autologous stem cell transplant [3]. Melphalan's efficacy has been attributed to its ability to induce cytotoxic interstrand cross-links (ICLs) in DNA [4], but it may also induce other lesions in DNA [5], RNA, proteins and lipids [6]. The mechanisms by which melphalan kills tumor cells thus remain elusive and identifying factors that attenuate melphalan sensitivity is crucial to improving therapeutic outcomes.

Acquired melphalan resistance in MM has been associated with reduced drug uptake [7], increased drug detoxification [8,9], reduced ICL formation and enhanced DNA repair of ICL lesions [10–12], modulation of DNA base excision and strand break repair [13,14], adaptation to reactive oxygen species (ROS) [15] and decreased apoptosis [16]; however, there are no robust biomarkers that predict melphalan resistance.

Here we have used transcriptomics and proteomics to investigate cellular changes associated with acquired melphalan resistance in the RPMI8226 multiple myeloma cell line. We observed a metabolic switch conforming to the Warburg effect in the melphalan-resistant cell line accompanied by an increased oxidative stress response and enhanced survival and proliferation signaling. The increased survival was partially mediated through VEGF- and IL8-induced PI3K/p38 signaling and upregulated expression of the AKR1C family of aldo-keto reductases. We demonstrate that targeting enzymes within the affected pathways by specific inhibitors can overcome acquired melphalan resistance.

## Materials and Methods

### Reagents and antibodies

For Western analysis antibodies to AKR1C2 (H00001646-D01, Abnova), AKR1C3 (H00008644-B01, Abnova), AKR1C4 (H00001109-M01, Novus), AKT1 (#2967, Cell Signaling), Caspase3 (sc-7148, Santa Cruz), SLC16A3 (O0A08662, Aviva Systems Biology) PARP-1 (sc-74470, Santa Cruz), STAT3 (sc-81385, Santa Cruz), pSTAT3 (S2690, Sigma) and  $\beta$ -actin (ab8226, Abcam) primary antibodies and HRP-conjugated secondary antibodies (Dako) were used. Melphalan, ursodeoxycholate, indomethacin, flufenamic acid, dichloroacetic acid, 2-deoxy-D-glucose, sodium oxamate, metformin, oligomycin, antimycinA, FLLL31, wortmannin, rapamycin, methyl glyoxal, acetylsalicylic acid, ibuprofen, (Sigma Aldrich), tert-butyl peroxide (Fluka), LY294002, SB203580 and BIRB0796 (Cell Signaling) were used in viability assays.

### Cell lines and preparation of cell extracts

MM cell lines RPMI8226 and RPMI8226-LR5 were kindly donated by Prof. William S. Dalton at the H. Lee Moffitt Cancer Center & Research Institute, Tampa, USA. Cells were maintained, treated with melphalan and cell extracts prepared as previously described [13].

### mRNA isolation and analysis

mRNA was isolated from six batches each of control and melphalan-treated RPMI8226 and RPMI8226-LR5 cells using the mirVana mRNA isolation kit (Ambion). RNA concentration and quality were determined using NanoDrop ND-8000 (NanoDrop Technologies) and Agilent 2100 Bioanalyzer (Agilent). RIN values of RNA samples used for cRNA amplification ranged from 8.5

to 10 (mean = 9.49). The Illumina TotalPrep RNA amplification Kit (Ambion) was used to amplify mRNA for hybridization on Illumina BeadChips. First strand cDNA was synthesized from each mRNA sample. Following second strand synthesis and purification, cRNA was synthesized for 12 hours. Gene expression profiles were measured using Illumina HumanHT-12\_V3 Expression BeadChip. Raw data were exported from Illumina GenomeStudio to R using the Bioconductor package `lumi` version 2.1.3. [17]. Data were quantile normalized and  $\log_2$  transformed. The groups were compared using a t-test with empirical Bayes correction from the Bioconductor package `Limma` [18]. The fold change was used to demonstrate rate of changes in average gene expressions between studied groups. Statistical analyses were performed using the false discovery rate (FDR) with a significance threshold of 0.01. The transcriptomic data have been deposited to the GEO repository with the identifier GSE60970 [19].

### Western analysis, viability assay and mROS analysis

Western analysis and MTT assays were performed as described [13]. mROS was analyzed using MitoSOX Red (Molecular Probes) according to the manufacturer's protocol. Briefly, cells ( $0.5 \times 10^6$  cells/ml) were pretreated with inhibitors for 6 h, washed with HBBS and incubated with MitoSOX for 10 min at 37°C. Flow cytometry was performed at 510 nm excitation and 580 nm emissions.

### Cytokine and lactate analysis

Briefly cells ( $0.5 \times 10^6$  cells/ml) were incubated in RPMI1640 medium until they reached approximately  $1 \times 10^6$  cells/ml and 80% viability. Medium (50  $\mu$ l) was used for cytokine measurements in duplicates using the Bioplex 27-plex human cytokine kit from BioRad as per manufacturer's instructions. Bioplex manager software was used for calculation of cytokine concentrations. Standard curves were optimized by the software and verified manually. Lactate levels were measured using the L-Lactate Assay Kit according to the manufacturer's protocol (Cayman). Extracellular lactate level was measured in medium, intracellular lactate in  $15 \times 10^6$  cells. Results were normalized and are shown as concentration of lactate/ $1 \times 10^6$  cells.

### Stable isotope labeling with amino acids in cell culture (SILAC) and LC-MS/MS analysis

RPMI8226 and RPMI8226-LR5 cells were grown in light ( $^{12}\text{C}_6$ -lysine) and heavy ( $^{13}\text{C}_6$ -lysine) medium, respectively (Pierce SILAC protein Quantitation kit-RPMI1640). Sensitive and resistant cells were mixed 1:1 and cell extracts prepared as above. Proteins were separated on 4–12% denaturing NuPAGE (Invitrogen) and stained with Simply Blue<sup>TM</sup> (Invitrogen). Thirteen bands were excised, reduced and alkylated prior to trypsin in-gel digestion as described [20]. Peptides were eluted with 50% acetonitrile in 5% formic acid and lyophilized before MS analysis. LC-MS/MS was conducted on an EASY-nLC (Proxeon) coupled to an LTQ-Orbitrap XL mass spectrometer (Thermo). Reconstituted samples were separated on an in-house 15 cm fused silica column (100  $\mu$ m i.d., 375  $\mu$ m o.d.) using a 50 min gradient up to 32% ACN in 0.1% formic acid and 250 nl/min flow rate. MS scans (300–1800 m/z) were acquired at a resolution of 60,000 (m/z 400) in the Orbitrap. During each duty cycle, up to five of the most intense peptides were selected for CID fragmentation in the ion trap. Raw files were processed in MaxQuant v.1.0.13.8, with Mascot searches utilizing human IPI database (version 3.52) containing extra entries for reverse protein sequences. Search criteria included carbamidomethylation as fixed modification, deamidation (NQ) and oxidation (M) as variable modifications, maximum of two missed cleavage sites and MS/MS tolerance of 0.6 Da. FDR thresholds for peptide and protein identifications were set to 1%. A minimum of two unique peptides was specified for

protein identifications, with protein quantification requiring at least two ratio measurements. The proteomics data have been deposited to the ProteomeXchange Consortium [21] via the PRIDE partner repository with the identifier PXD001276 [22].

## Statistical analysis

Significance and p-value in viability assays were obtained from the GraphPad Prism software (GraphPad Software). Each experiment was conducted in triplicate, data were analyzed using one-way ANOVA and student–Newman-Keuls multiple test, where: ns— $p > 0.05$ , \* -  $0.05 \geq p > 0.01$ , \*\* -  $0.01 \geq p > 0.001$ , \*\*\* -  $p \leq 0.001$ .

## Results

### Illumina and SILAC gene expression profiling

To investigate large scale alterations in gene expression accompanying melphalan resistance, we used the multiple myeloma cell line RPMI8226 and its melphalan-resistant derivative LR5. The stable isotope labeling by amino acids in cell culture (SILAC) approach resulted in the identification of 1042 proteins, of which 668 were quantified using MaxQuant (PEP  $< 0.01$ ) (S1 Table). The histogram of the  $\log_2$  SILAC ratios showed a normal distribution centered at zero, supporting similar overall protein loads of the H/L samples (Fig. 1A). Illumina HumanHT-12\_V3 annotation data were used for mapping mRNA expression and led to 4580 identifications with p-values  $< 0.05$  (S2 Table). We considered differentially expressed genes (DEGs) exhibiting an absolute fold change above 1.25 because the cell lines were isogenic and proliferated similarly. This resulted in 424 and 2842 unique proteins and mRNAs, respectively (S1 and S2 Tables), of which 175 proteins and mRNAs overlapped (Fig. 1B). We observed a high correlation of expression data from the protein and mRNA analyses (up-regulated  $R^2 = 0.91$ , down-regulated  $R^2 = 0.72$ , Fig. 1C). The most differentially regulated proteins in the SILAC analyses are listed in Table 1 together with their corresponding fold changes at the mRNA level.

### Melphalan-resistant RPMI8226 cells display altered expression of metabolic enzymes conforming to the Warburg effect

To search for modified biological pathways in the resistant cells, gene identifiers in the SILAC dataset were mapped in the Ingenuity Knowledge Base, entered into Ingenuity Pathway Analysis (IPA) and plotted onto canonical pathways. Glycolysis was identified as the most significantly altered pathway ( $p = 1.31 \times 10^{-9}$ ), and several other respiratory metabolism pathways were also significantly altered (Fig. 1D, E). Specifically, most of the glycolytic and pentose phosphate pathway (PPP) enzymes were up-regulated in the resistant cells, whereas the tri-carboxylic acid (TCA) cycle and electron transport chain proteins were down-regulated (Fig. 2). Such a metabolic switch is a characteristic feature of the Warburg effect [23], which is considered a survival mechanism in cancerous tissues [24] that also mediates resistance to apoptosis [25] and to oxidative stress [26]. The underlying mechanisms leading to the Warburg effect are not well understood. However, a number of oncogenes, including c-MYC, are known to enhance the expression of glycolytic enzymes, such as lactate dehydrogenase (LDHA) [27]. Although c-MYC was not quantified by SILAC, its mRNA was 1.8-fold up-regulated in the melphalan-resistant cells (S2 Table) and 1.5-fold upregulated as quantified by western blot (data not shown).

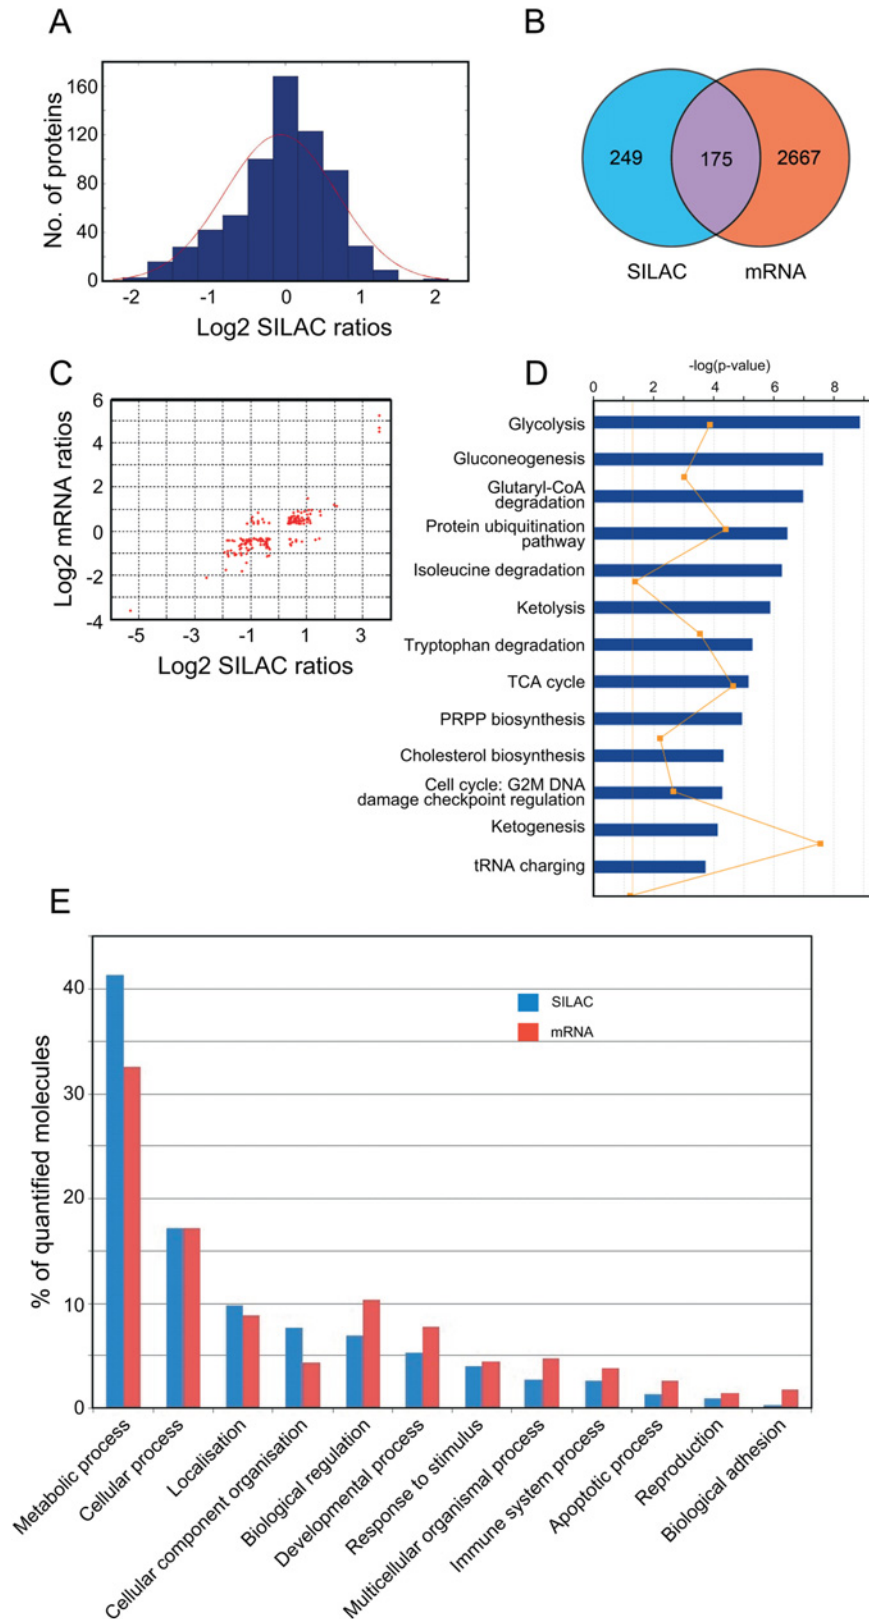

**Fig 1. SILAC and mRNA quantitative profiling.** (A), histogram of log<sub>2</sub> SILAC ratios. (B), Venn diagram of DEGs identified in SILAC and mRNA analyses (threshold 1.25 fold change). (C), Scatter plot illustrating fold



change relationships between DEGs identified in SILAC and mRNA analyses. (D), Most affected canonical pathways as identified by IPA analysis of SILAC data (threshold 1.25x change). The orange line represents the ratio of the number of genes represented within each pathway to the total number of genes in the pathway. (E), Distribution of DEGs in GO: biological process categories.

doi:10.1371/journal.pone.0119857.g001

## Melphalan-resistant cells display markedly increased sensitivity towards inhibitors targeting turnover of glycolytic intermediates

To further analyze the significance of carbohydrate metabolism in melphalan resistance, sensitive and resistant cells were grown in the presence or absence of glucose. Glucose deprivation had a significantly stronger growth-inhibitory effect in resistant cells compared to sensitive cells (Fig. 3A). We then subjected both cell lines to treatment with enzyme inhibitors that target different steps in glycolysis and the PPP. 2-deoxy-D-glucose (2-DG) inhibits hexokinase (HK) and phosphoglucosomerase (GPI) and thus funneling of precursors into both glycolysis and PPP. Blocking glycolysis causes ATP depletion, cell cycle arrest and cell death, while blocking PPP inhibits NADPH synthesis and reduces the antioxidant capacity of the cells. 6-aminonicotinamide (6-AN) potently inhibits glucose-6-phosphate dehydrogenase (G6PD) and selectively inhibits PPP. G6PD was more than two-fold up-regulated in the melphalan-resistant cells according to the SILAC analyses. Sodium oxamate (SO) inhibits the conversion of pyruvate to lactate by LDHA, thus inhibiting glycolysis by depleting  $\text{NAD}^+$  [28]. Finally, dichloroacetate (DCA) inhibits all pyruvate dehydrogenase kinase (PDK) isoenzymes, thus increasing the activity of pyruvate dehydrogenase (PDH) and increasing the acetyl-CoA introduced into the TCA cycle [29]. All of these inhibitors had a significantly stronger growth-inhibitory effect upon melphalan-resistant cells and this was also observed when inhibitors were combined with 2.5  $\mu\text{M}$  melphalan (Fig. 3A). This corroborates that a metabolic switch towards aerobic glycolysis contributes to the melphalan-resistant phenotype.

## Melphalan-resistant cells display increased tolerance to overall oxidative stress, but are sensitive to mitochondrial electron transport inhibitors

DCA mediated the largest selective effect against the resistant cells (Fig. 3A). This inhibitor does not directly target glycolytic or PPP enzymes. We thus measured mitochondrial ROS subsequent to DCA-treatment to examine whether increased metabolic flux into mitochondria was less tolerated by the melphalan-resistant cells. As illustrated in Fig. 3B increased mitochondrial ROS was selectively induced in the melphalan-resistant cells subsequent to DCA-treatment. Western analysis of PARP1 and caspase-3 revealed weak induction of PARP1 cleavage in both cell lines subsequent to DCA treatment, whereas combined DCA/melphalan treatment mediated markedly increased cleavage of both PARP1 and caspase-3 in the melphalan-resistant cells (Fig. 3C).

Increased mitochondrial stress may reduce the mitochondrial capability to regenerate  $\text{NAD}^+$  to support glycolytic ATP-production. This would more severely impact the resistant cells given their increased dependence upon glycolytic ATP-production. We tested this by treating the cells with electron transport chain inhibitors (metformin and antimycin A) or with the ATP synthase inhibitor oligomycin. Metformin and antimycin A were more toxic to the resistant cells both in the presence and absence of 2.5  $\mu\text{M}$  melphalan, whereas oligomycin was more toxic to the sensitive cells under both conditions (Fig. 3D). Oligomycin inhibits mitochondrial ATP synthase and does not directly affect the  $\text{NAD}^+$ -generating steps. These results

**Table 1. Most up- and downregulated genes in melphalan-resistant cells as determined from SILAC and Illumina analysis.**

| Gene symbol | Protein name                                                  | REFSEQ       | Fold change SILAC <sup>a</sup> | Fold change Illumina <sup>a</sup> |
|-------------|---------------------------------------------------------------|--------------|--------------------------------|-----------------------------------|
| AKR1C3      | aldo-keto reductase family 1, member C3                       | NP_003730    | <b>12,053</b>                  | <b>25,507</b>                     |
| VIM         | vimentin                                                      | NP_003371    | <b>4,212</b>                   | <b>2,208</b>                      |
| MACF1       | microtubule-actin crosslinking factor 1                       | NP_149033    | <b>3,968</b>                   | <b>2,263</b>                      |
| POLR1A      | polymerase (RNA) I polypeptide A, 194kDa                      | NP_056240    | <b>3,345</b>                   |                                   |
| CBR1        | carbonyl reductase 1                                          | NP_001748    | <b>2,839</b>                   | 1,159                             |
| UAP1        | UDP-N-acteylglucosamine pyrophosphorylase 1                   | NP_003106    | <b>2,836</b>                   | <b>1,654</b>                      |
| KHDRBS1     | KH domain containing, RNA bindingSAM68                        | NP_006550    | <b>2,796</b>                   | 1,193                             |
| ANXA5       | annexin A5                                                    | NP_001145    | <b>2,789</b>                   | <b>1,859</b>                      |
| G3BP1       | GTPase activating protein (SH3 domain) binding protein 1      | NP_005745    | <b>2,759</b>                   | -1,192                            |
| KPNA2       | karyopherin alpha 2 (RAG cohort 1, importin alpha 1)          | NP_002257    | <b>2,549</b>                   | 1,093                             |
| PRPF19      | PRP19/PSO4 pre-mRNA proc.factor 19                            | NP_055317    | <b>2,483</b>                   | -1,311                            |
| PSME3       | proteasome (prosome, macropain) activator subunit 3           | NP_789839    | <b>2,441</b>                   | 1,169                             |
| ARD1A       | ARD1 homolog A, N-acetyltransferase ( <i>S. cerevisiae</i> )  | NP_003482    | <b>2,307</b>                   | 1,212                             |
| HNRNPA3     | heterogeneous nuclear ribonucleoprotein A3                    | NP_919223    | <b>2,272</b>                   | <b>1,945</b>                      |
| HSPA8       | heat shock 70kDa protein 8                                    | NP_006588    | <b>2,237</b>                   | 1,158                             |
| XPO5        | exportin 5                                                    | NP_065801    | <b>2,199</b>                   | <b>1,287</b>                      |
| ABCE1       | ATP-binding cassette, sub-family E (OABP), member 1           | NP_001035809 | <b>2,177</b>                   | <b>1,721</b>                      |
| PPID        | peptidylprolyl isomerase D                                    | NP_005029    | <b>2,162</b>                   | -1,015                            |
| ACTN4       | actinin, alpha 4                                              | NP_004915    | <b>2,156</b>                   | <b>1,396</b>                      |
| CKAP5       | cytoskeleton associated protein 5                             | NP_001008938 | <b>2,136</b>                   | 1,237                             |
| G6PD        | glucose-6-phosphate dehydrogenase                             | NP_000393    | <b>2,101</b>                   | <b>1,935</b>                      |
| DDX19A      | DEAD (Asp-Glu-Ala-As) box polypeptide 19A                     | NP_060802    | <b>2,088</b>                   | <b>1,467</b>                      |
| NAPG        | splicing factor proline/glutamine-rich                        | NP_003817    | <b>2,054</b>                   | <b>2,813</b>                      |
| MYO1C       | N-ethylmaleimide-sensitive factor attachment protein $\gamma$ | NP_001074248 | <b>2,025</b>                   |                                   |
| PTBP1       | polypyrimidine tract binding protein 1                        | NP_002810    | <b>2,022</b>                   | 1,328                             |
| CBR3        | carbonyl reductase 3                                          | NP_001227    | <b>2,019</b>                   | <b>1,430</b>                      |
| LRBA        | LPS-responsive vesicle trafficking, beach and anchor c.       | NP_006717    | <b>2,007</b>                   | <b>1,670</b>                      |
| RRBP1       | ribosome binding protein 1 homolog 180kDa (dog)               | NP_001036041 | <b>-2,618</b>                  | <b>-1,773</b>                     |
| SERPINH1    | serpin peptidase inhibitor, clade H member 1                  | NP_001226    | <b>-2,639</b>                  | -1,609                            |
| MESDC2      | mesoderm development candidate 2                              | NP_055969    | <b>-2,733</b>                  |                                   |
| FN1         | fibronectin 1                                                 | NP_997647    | <b>-2,849</b>                  |                                   |
| SFN         | stratifin                                                     | NP_006133    | <b>-2,859</b>                  | <b>-2,069</b>                     |
| PCK2        | phosphoenolpyruvate carboxykinase 2 (mitochondrial)           | NP_004554    | <b>-2,894</b>                  | -1,22                             |
| NSDHL       | NAD(P) dependent steroid dehydrogenase-like                   | NP_001123237 | <b>-2,904</b>                  | -1,155                            |
| DCI         | dodecenoyl-Coenzyme A delta isomerase                         | NP_001910    | <b>-2,956</b>                  | <b>-2,122</b>                     |
| MAN2A1      | mannosidase, alpha, class 2A, member 1                        | NP_002363    | <b>-3,007</b>                  | <b>-1,378</b>                     |
| STT3B       | STT3, subunit of oligosaccharyltransferase compl. hom. B      | NP_849193    | <b>-3,016</b>                  | <b>-1,356</b>                     |
| PDIA5       | protein disulfide isomerase family A, member 5                | NP_006801    | <b>-3,019</b>                  | <b>-1,946</b>                     |
| DNAJB11     | DnaJ (Hsp40) homolog, subfamily B, member 11                  | NP_057390    | <b>-3,045</b>                  | -1,130                            |
| ERP44       | endoplasmic reticulum protein 44                              | NP_055866    | <b>-3,070</b>                  |                                   |
| DDOST       | dolichyl-diphosphooligosaccharide-protein glycosyltransf.     | NP_005207    | <b>-3,163</b>                  | <b>-1,347</b>                     |
| PDIA4       | protein disulfide isomerase family A, member 4                | NP_004902    | <b>-3,271</b>                  | <b>-1,835</b>                     |
| PDIA6       | protein disulfide isomerase family A, member 6                | NP_005733    | <b>-3,419</b>                  | <b>-2,008</b>                     |
| ERP29       | endoplasmic reticulum protein 29                              | NP_006808    | <b>-3,487</b>                  | <b>-2,231</b>                     |
| IGF2R       | insulin-like growth factor 2 receptor                         | NP_000867    | <b>-3,530</b>                  | 1,248                             |
| STAT1       | signal transducer and activator of transcription 1, 91kDa     | NP_009330    | <b>-3,536</b>                  | -1,883                            |
| ASS1        | argininosuccinate synthetase 1                                | NP_000041    | <b>-3,543</b>                  | -2,069                            |

(Continued)

Table 1. (Continued)

| Gene symbol | Protein name                                             | REFSEQ       | Fold change SILAC <sup>a</sup> | Fold change Illumina <sup>a</sup> |
|-------------|----------------------------------------------------------|--------------|--------------------------------|-----------------------------------|
| STOML2      | stomatin (EPB72)-like 2                                  | NP_038470    | <b>-3,594</b>                  | <b>-1,335</b>                     |
| CKB         | creatine kinase, brain                                   | NP_001814    | <b>-3,615</b>                  | -1,126                            |
| CANX        | calnexin                                                 | NP_001019820 | <b>-3,675</b>                  | <b>-3,408</b>                     |
| IDH2        | isocitrate dehydrogenase 2 (NADP+), mitochondrial        | NP_002159    | <b>-3,819</b>                  | <b>-1,977</b>                     |
| EPHX1       | epoxide hydrolase 1, microsomal (xenobiotic)             | NP_000111    | <b>-3,983</b>                  | -1,13                             |
| PHGDH       | phosphoglycerate dehydrogenase                           | NP_006614    | <b>-6,014</b>                  | <b>-4,343</b>                     |
| C2orf30     | endoplasmic reticulum lectin 1                           | NP_056516    | <b>-8,235</b>                  | -1,340                            |
| PDIA2       | protein disulfide isomerase family A, member 2           | NP_006840    | <b>-14,947</b>                 |                                   |
| MYO6        | myosin VI                                                | NP_004990    | <b>-20,807</b>                 |                                   |
| MX1         | myxovirus resistance 1, interferon-inducible protein p78 | NP_002453    | <b>-39,202</b>                 | <b>-12,073</b>                    |

<sup>a</sup>Statistically significant values are highlighted in bold.

doi:10.1371/journal.pone.0119857.t001

further confirm the increased dependence of the melphalan-resistant cells to glycolytic ATP production.

The melphalan-resistant cells were also more tolerant towards the unspecific pro-oxidant tert-butyl hydroperoxide (t-BHP) (Fig. 3D). The cytotoxic effects of t-BHP have been shown to be counteracted by activation of the NRF2-mediated stress response [30]. In affirmation of this, we observed that NRF2 mRNA was significantly up-regulated (1.5 ×) in the resistant cells and the NRF2-mediated oxidative stress response was reported to be significantly ( $p = 1.03 \times 10^{-4}$ ) modulated in the IPA analysis. From these results we concluded that the melphalan-resistant cells are more tolerant of oxidative stress, mediated at least partially by NRF2, but are selectively sensitive towards drugs that inhibit NAD<sup>+</sup> regeneration.

### Lactate accumulation and IL8/VEGF signaling contribute to increased survival in the melphalan-resistant cells

The observed metabolic shift should result in increased lactate production in the resistant cells to regenerate NAD<sup>+</sup> and facilitate glycolytic ATP production. We found a higher intracellular but lower extracellular lactate content in the melphalan-resistant cells (Fig. 4A), indicating that lactate is retained in the melphalan-resistant cells. Lactate is exported from cells by the monocarboxylate transporters of the SLC16 family, of which SLC16A3 (MCT4) is the major lactate transporter in leukocytes [31]. SLC16A3 was 4.7-fold down-regulated at the mRNA level in the melphalan-resistant cells (S2 Table), but was not quantified in the SILAC analysis. Western analysis of SLC16A3 revealed no significant reduction in the melphalan-resistant cells (Fig. 4B).

Lactate can serve as metabolic fuel in certain cell types via the proposed cytoplasmic/mitochondrial lactate shuttle [32,33]. In addition, lactate may act as a signaling molecule inducing a pseudo-hypoxic condition leading to up-regulation of NF-κB/IL-8 and pro-angiogenic VEGF [34]. The latter is also supported by the co-regulated expression of lactate dehydrogenase and VEGF in tumor cells [35]. We found that IL-8 was 4.4-fold up-regulated at the mRNA level (S2 Table) and both IL-8 and VEGF secretion were increased (>12- and 1.7-fold, respectively) in the melphalan-resistant cells (Fig. 4C). IL-8 and VEGF can mediate pro-survival and proliferation responses through alternative downstream pathways. One of the downstream effectors of IL-8 is STAT3 [36], which has emerged as a potential oncogene target in many solid and hematologic cancers, including MM [37]. However, we found no difference in STAT3 mRNA levels



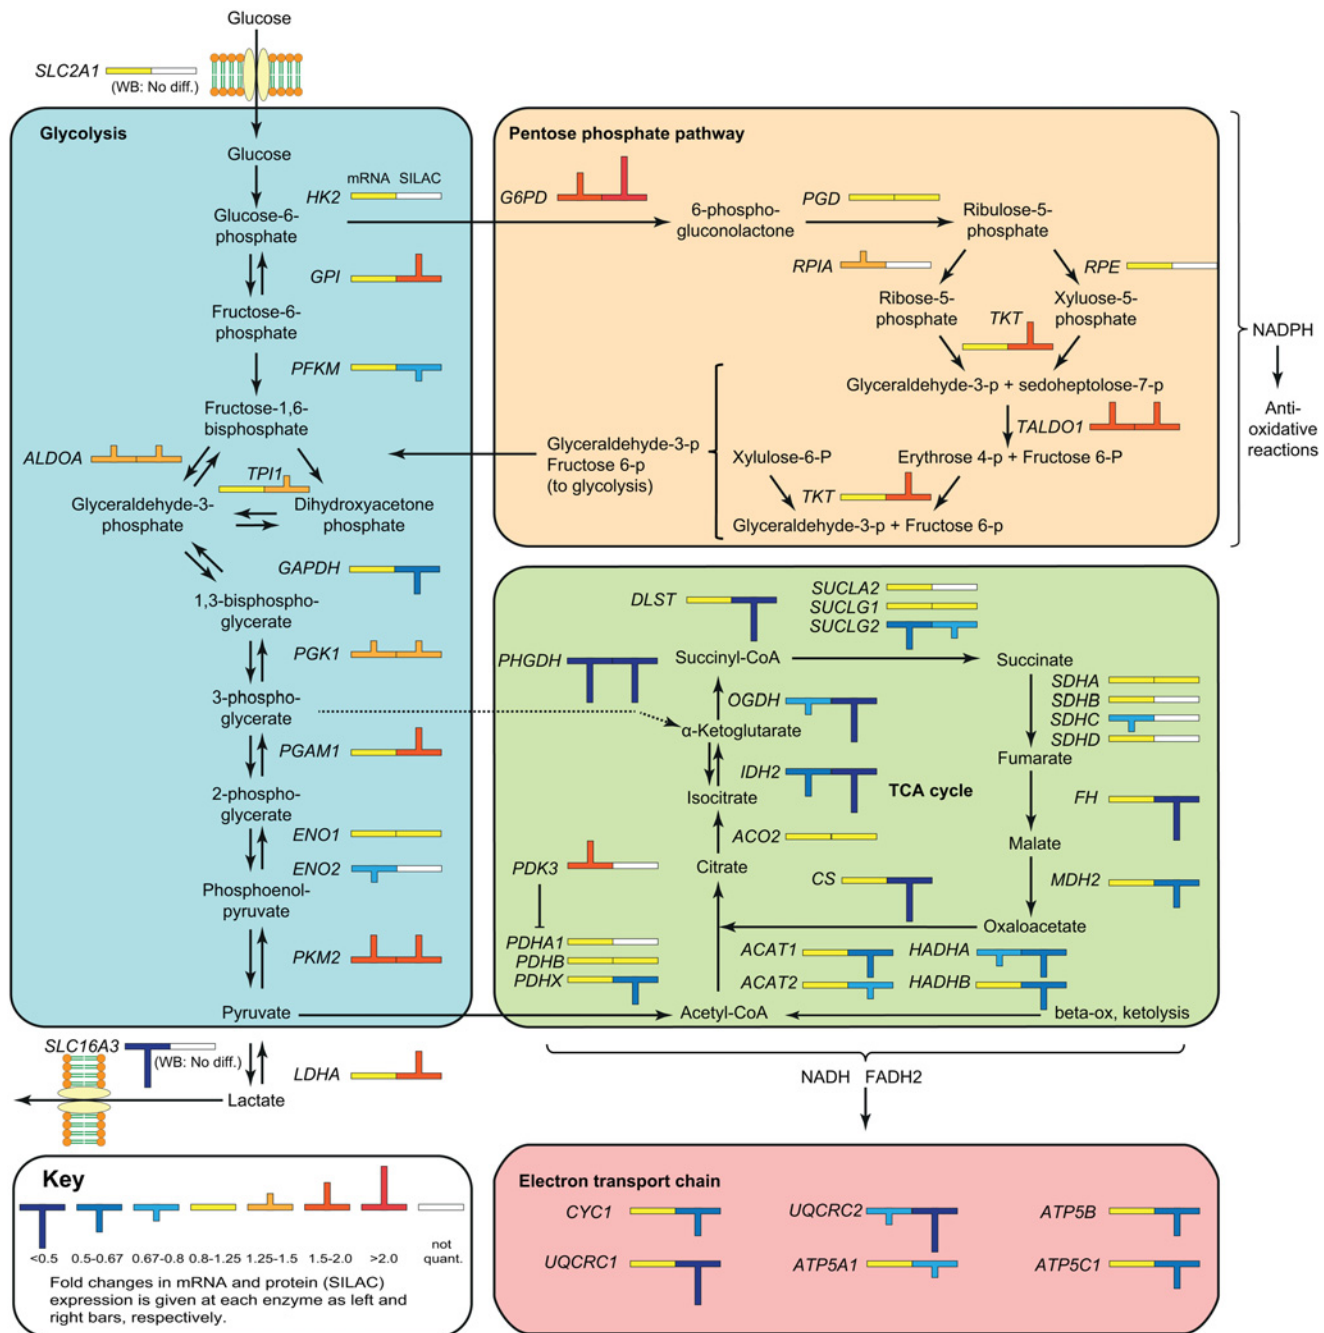

**Fig 2. Overview of DEGs in the glycolytic and oxidative metabolic pathways.** The observed up-regulation of factors in the glycolytic- and pentose phosphate pathways and down-regulation of factors in the TCA cycle and the mitochondrial electron transport chain conform to a Warburg type metabolic switch.

doi:10.1371/journal.pone.0119857.g002

in the sensitive and resistant cells (S2 Table). Moreover, western analysis revealed no induction of total- or phosphorylated (pY705) STAT3 protein in the resistant cells (Fig 4D). We also subjected the cells to treatment with the STAT3 inhibitor FLLL31, and found that the inhibitor selectively reduced viability in the melphalan-sensitive cells both in the absence and presence of 2.5 μM melphalan (Fig 4E). An explanation to this could be that alternative survival pathways

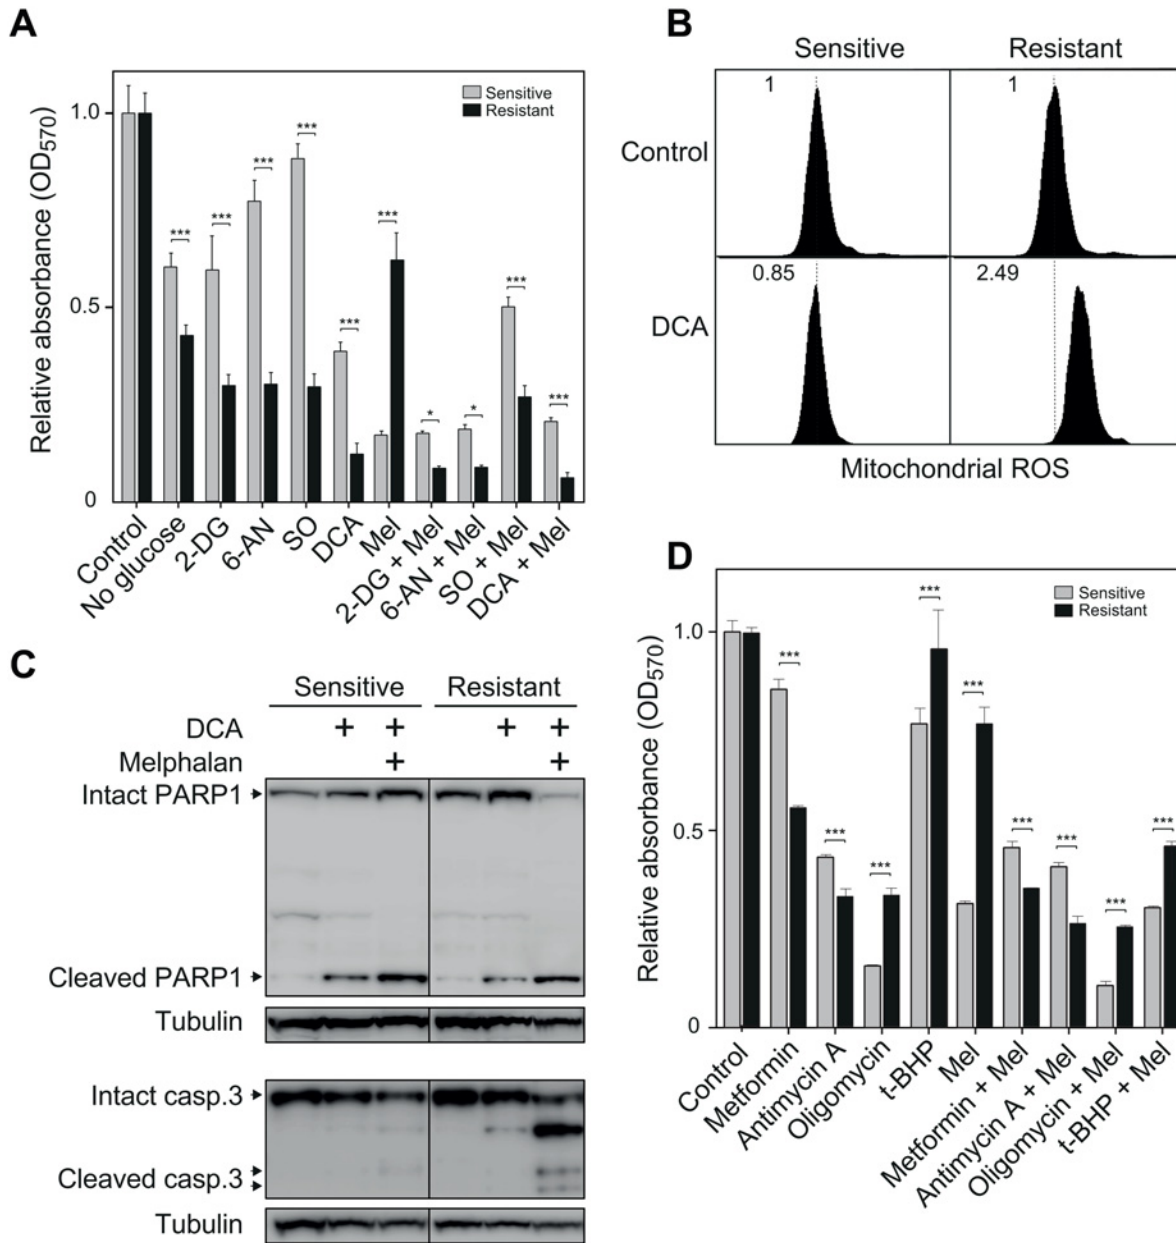

**Fig 3. Melphalan-resistant cells are selectively sensitive to inhibitors targeting enzymes in glycolytic- and pentose phosphate pathways as well as complexes in the mitochondrial electron transport chain.** (A), Bar diagram illustrating effect of inhibitors targeting various enzymes in carbohydrate metabolism (2-DG, 1 mM, 6-AN, 1 mM, SO, 20 mM, DCA, 10 mM) when administered in the presence or absence of 2.5  $\mu$ M melphalan (Mel). (B), DCA treatment selectively mediates increased mitochondrial ROS in the resistant cells. (C), Western analysis of the apoptotic markers PARP1 (upper panels) and caspase-3 (bottom panels) illustrating increased cleavage of both proteins subsequent to co-treatment of the resistant cells with DCA and melphalan. (D), Bar diagram illustrating effect of inhibitors targeting the mitochondrial electron transport chain or ATP synthesis (melformin, 3 mM, antimycin A, 30  $\mu$ M, oligomycin, 10  $\mu$ M) and the general pro-oxidant tBHP (20  $\mu$ M) when administered in the presence or absence of 2.5  $\mu$ M melphalan. (E), Western analysis of AKT1 and pAKT1 in the sensitive and resistant cells.

doi:10.1371/journal.pone.0119857.g003

are up-regulated in the melphalan-resistant cells making them less dependent on STAT3 signaling.

To further investigate the impact of IL-8/VEGF signaling, we subjected the cells to inhibitors that target downstream effectors of IL-8 and VEGF, specifically within the PI3K and p38

MAPK signaling pathways. LY294002 and wortmannin are kinase inhibitors that target PI3K, and rapamycin inhibits mTOR downstream of PI3K. All the PI3K/mTOR inhibitors were more cytotoxic to the melphalan-resistant cells and abolished the selective proliferation advantage of the resistant cells observed with 2.5  $\mu$ M melphalan alone (Fig. 4E). The mTOR pathway has been suggested to be a potential therapeutic target in myeloma characterized by up-regulated AKT1 [38]. We did not observe a difference in mTOR and AKT1 mRNA levels between melphalan-resistant and sensitive cells (S2 Table) and could not quantify the proteins by SILAC. We therefore measured AKT1 by western blot and found that AKT1 and pAKT1 expression is decreased in melphalan-resistant cells (Fig. 4F). Thus, mTOR inhibition does not fully explain the selective cytotoxicity of these inhibitors in melphalan-resistant cells.

The p38 MAPK inhibitor SB203580 is strictly selective for p38 $\alpha$  and  $\beta$ , whereas BIRB0796 inhibits p38 $\alpha$ ,  $\beta$ ,  $\delta$  and  $\gamma$  [39]. In addition, SB203580 inhibits CK1, GSK3, RIP2 and GAK, and BIRB0796 inhibits JNK2 [38]. BIRB796 was much more cytotoxic in the melphalan-resistant cells, having little effect on the resistant cells, whereas SB203580 showed no selectivity towards either cell line when administered alone. However, both inhibitors reversed the selective growth advantage of the melphalan-resistant cells in 2.5  $\mu$ M melphalan (Fig. 4B). Taken together, the selective cytotoxicity of inhibitors acting downstream of IL-8/VEGF supports a role of IL-8/VEGF-signaling in acquired melphalan resistance in MM.

### A potential role of aldo-keto reductases in melphalan resistance

The aldo-keto reductase AKR1C enzymes constitute a family of oxidoreductases that catalyze NADPH-dependent reduction of a wide variety of substrates [40]. Here, AKR1C1–3 regulate ligand occupancy and *trans*-activation of androgen-, estrogen- and progesterone receptors, the peroxisome proliferator-activated receptor (PPAR $\gamma$ ) as well as the prostaglandin metabolism [41]. AKR1C1 members displayed the most pronounced up-regulated expression in both the SILAC and mRNA profiling analyses (Fig. 5A). Due to their extensive sequence homology (84% to 98%), AKR1C1–4 were collectively reported as 12-fold up-regulated in SILAC. AKR1C2, 3 and 4 mRNA were 37-, 25- and 22-fold up-regulated, respectively. We also measured AKR1C2, C3 and C4 by western blot and observed the most prominent up-regulation of AKR1C2 and C3 (15.6- and 28.2-fold, respectively, Fig. 5A, B). Moreover, enzyme levels did not increase in either cell line after 50  $\mu$ M melphalan treatment (Fig. 5B), indicating that their up-regulation is a result of adaptation to prolonged treatment with low dose melphalan rather than an immediate stress response mediated by short time exposure to high dose melphalan.

To explore the potential role of AKR1C2 and C3 in the melphalan resistance mechanism, melphalan-sensitive and-resistant cells were treated with aldo-keto reductase inhibitors. Flufenamic acid (FA) is a non-steroidal anti-inflammatory drug (NSAID) that has anti-inflammatory and antipyretic properties and acts as a broad-spectrum AKR1C inhibitor. In addition it modulates several channel activities and is an activator of AMP-activated protein kinase [42]. Indomethacin (IM) is an NSAID commonly used to reduce fever and pain by inhibiting the production of prostaglandins, and inhibits AKR1C3 much more potently than AKR1C1 and AKR1C2 [43,44]. IM and FA are also nanomolar and micromolar inhibitors, respectively, of COX-1/2 (PTGS1/2) [45]. Previous work suggests, however, that the antiproliferative effect of IM upon myeloma cells is independent of COX-2 [46]. Notably FA and IM were moderately selectively cytotoxic to the melphalan-resistant cells when administered alone (Fig. 5C, left panel). When administered together with melphalan, both inhibitors markedly reversed the resistant phenotype (Fig. 5C, right panel). To further investigate the specific role of AKR1C in the melphalan-resistant cells we also tested the non-NSAID drug ursodeoxycholate (UDC). UDC is a bile acid drug that reduces cholesterol absorption and is used to treat primary biliary

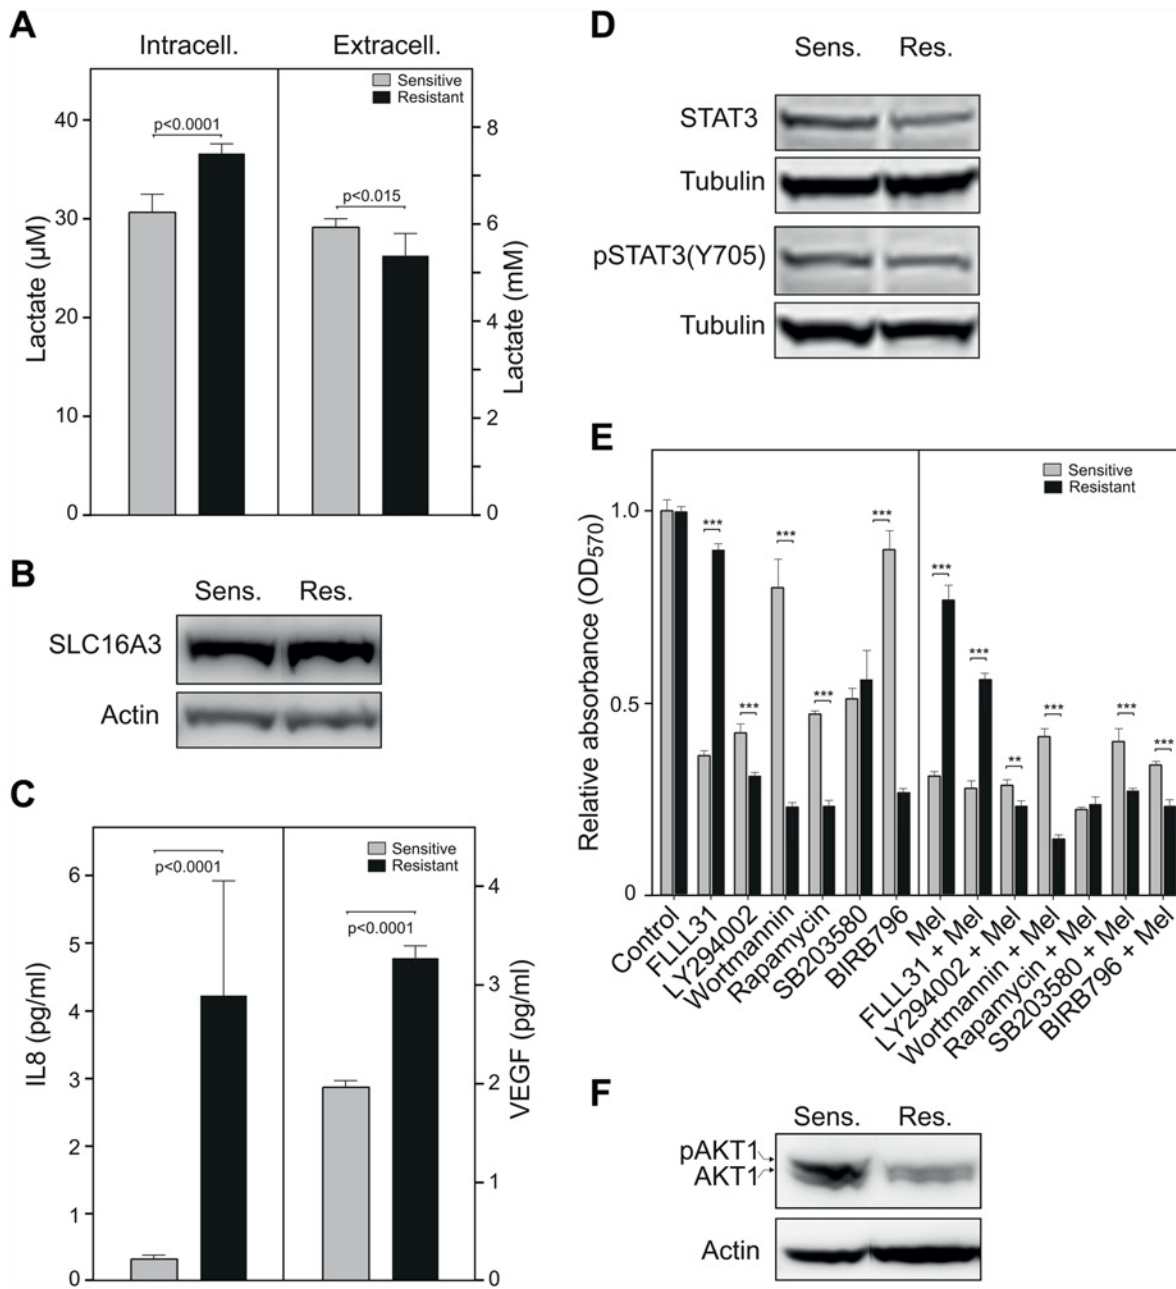

**Fig 4. Lactate accumulates in melphalan resistant cells and may mediate increased IL8- and VEGF signaling.** (A), Bar diagrams demonstrating significantly increased lactate accumulation in melphalan-resistant cells (left panel), and significantly lower lactate in the extracellular medium (right panel). (B), Western analysis revealed no significant change in expression of the major lactate exporter SLC16A3 (C), Bioplex cytokine profiling demonstrated markedly elevated synthesis of IL8 (left panel) and VEGF (right panel) in the melphalan-resistant cells. (D), Western analysis demonstrated no induced activation of STAT3 in the melphalan resistant cells as probed with anti-pSTAT3 (Y705 antibody). (E), Bar diagram illustrating the effects of various inhibitors targeting STAT3 (FLLL31, 3µM), PI3-kinases (LY294002, 10 µM, wortmannin, 2 µM, rapamycin, 5nM) and p38 MAP kinases (SB203580, 10 µM, BIRB796, 10 µM). (F), Western analysis demonstrating down-regulation of p-AKT1 and AKT1 in the melphalan-resistant cells.

doi:10.1371/journal.pone.0119857.g004

cirrhosis. It inhibits both AKR1C2 and C3 and has been shown to have pro- and anti-apoptotic properties depending on the cell lines and experimental systems employed [47,48]. Importantly, UDC mediated a nearly complete reversal of the melphalan-resistant phenotype, similar to that seen with FA (Fig 5C, right panel). These results strongly suggest that AKR1C2 and C3

contribute to melphalan resistance in the myeloma cells. However, to further investigate whether a general effect mediated by NSAID treatment was involved in reversal of resistance, the cells were also treated with acetylsalicylic acid or ibuprofen. As demonstrated in Fig. 5D, such treatment did not mediate any change in the relative resistance of the myeloma cells, further substantiating that FA and IM primarily affect melphalan resistance by AKR1C inhibition.

In a recent study of aldehyde toxicity in neuroblastoma cells, Lyon et al. [49] demonstrated that the AKR1C3 protein level could be induced by short-time treatment with sub-lethal doses of either methyl glyoxal or 4-hydroxy-2-nonenal (4HNE). These reactive aldehydes are increased in several neurodegenerative diseases [50] and recombinant AKR1C1–3 have been shown to possess high specific activities against 4HNE [51]. Incubation of the melphalan-sensitive and-resistant cells in 1  $\mu$ M methyl glyoxal for 24 h mediated a strong up-regulation of AKR1C3 in the melphalan-sensitive cells whereas the AKR1C3 level remained unaltered in the resistant cells. AKR1C2 was also up-regulated by the pretreatment, but much weaker than AKR1C3 (Fig. 5E). The treatment did not mediate any cytotoxic effect in the cells (Fig. 5F). However, subsequent treatment of the cells in 2.5  $\mu$ M melphalan demonstrated that the methyl glyoxal pretreatment mediated a resistant phenotype in the parental RPMI8226 cells resembling that of the LR5 derivative (Fig. 5F). These results corroborate the inhibitor studies and support a role of AKR1C aldo-keto reductases in mediating melphalan resistance in the myeloma cells.

## Discussion

MM is a complex and heterogeneous disease and as such, many factors likely contribute to acquired melphalan resistance. Here we used a transcriptomic and proteomic approach to identify key proteins involved in melphalan resistance in isogenic myeloma cell lines. We thereby demonstrated an active involvement of a metabolic switch in melphalan-resistant cells towards aerobic glycolysis accompanied by an increased tolerance towards oxidative stress. Aerobic glycolysis (Warburg effect) has been largely ignored in cytostatic resistance research, but several recent findings indicate that combining cytostatics with targeted inhibition of aberrant cellular metabolism may overcome chemorefractoriness [52]. We similarly targeted the glycolytic pathway with 2-DG, 6-AN and SO and found that they were selectively cytotoxic to melphalan-resistant cells. 2-DG has recently been implemented in phase-I clinical trials in patients with advanced solid tumors [53] and its cytotoxicity has been partially attributed to glycolytic inhibition.

DCA was also selectively cytotoxic to the melphalan-resistant cells, and this is corroborated by Sanchez *et al.*, who demonstrated a selective effect of DCA in multiple myeloma cell lines having high aerobic glycolysis [54]. DCA also increased the sensitivity of these cells towards the proteasome inhibitor bortezomib. ROS induction has been demonstrated to play a critical role in bortezomib-induced apoptosis by disrupting the mitochondrial membrane potential [55], and DCA has been shown to synergistically inhibit proliferation in melanoma cells with induced mitochondrial ROS [56]. Melphalan and other DNA cross-linkers increase mitochondrial ROS in HeLa and HCT cells [57] and oxidative stress has been shown to increase melphalan cytotoxicity in chronic myeloid leukemia cells [58]. Thus, DCA could potentiate the effects of melphalan (as well as other cytostatic drugs) by inducing cellular oxidative stress, possibly because the mitochondrial metabolism is down-regulated to counterbalance the oxidative stress induced by continuous drug exposure.

In addition to mediating increased mitochondrial ROS, DCA also depletes substrate from the NAD<sup>+</sup>-generating LDHA step. This slows glycolytic ATP production, rendering the melphalan-resistant cells more sensitive to treatment. The increased reliance of NAD<sup>+</sup>-dependent



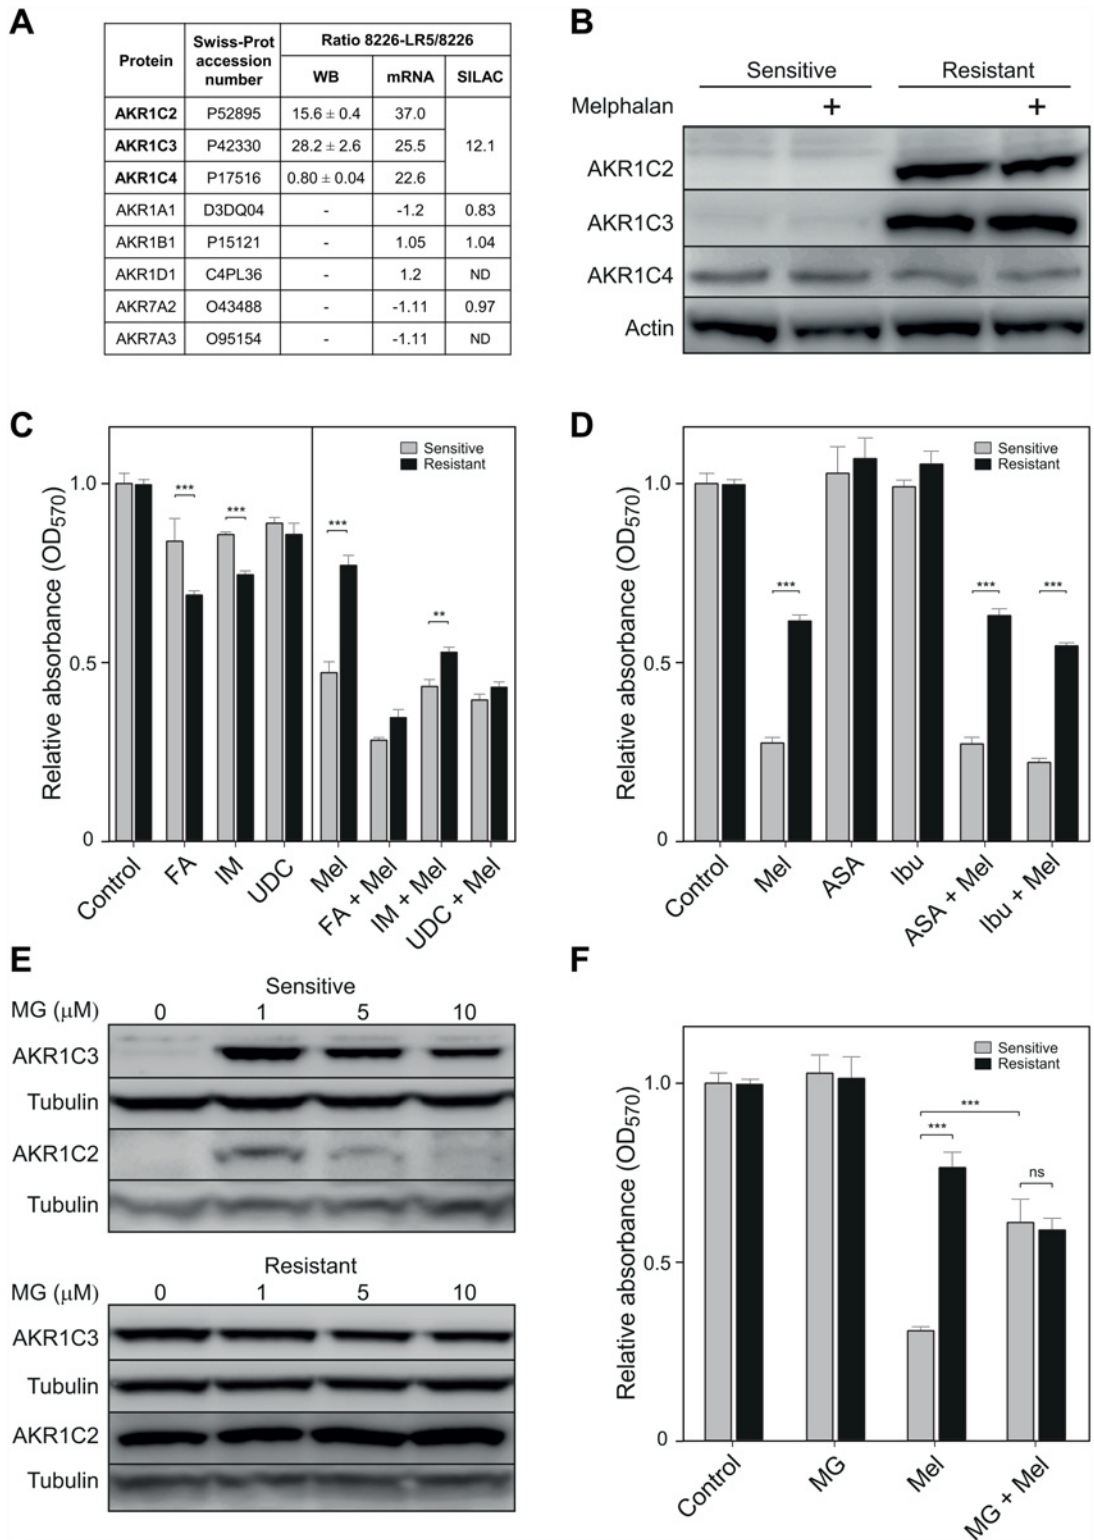

**Fig 5. Aldo-keto reductases contribute to melphalan resistance in MM cells.** (A), Diagram showing markedly up-regulated levels of the AKR1C family in both SILAC and mRNA analyses, whereas members of other AKR subfamilies are not significantly altered. (B), Western analysis confirmed up-regulation of AKR1C2 and C3, but not C4. (C), Bar diagram illustrating the effects of AKR inhibitors flufenamic acid (FA, 70  $\mu$ M), ursodeoxycholate (UDC, 16  $\mu$ M) and indomethacin (IM, 16  $\mu$ M) when administered in the presence or absence of 2.5  $\mu$ M melphalan. (D), Bar diagram illustrating that co-treatment of the myeloma cells with NSAIDs acetylsalicylic acid (ASA) or ibuprofen (Ibu) with melphalan does not reverse the melphalan-resistant phenotype. (E), Western analysis

demonstrating strong induction of AKR1C3 and a weaker induction of AKR1C2 in the melphalan-sensitive cells (upper panel) subsequent to 20 h incubation in various concentrations of methyl glyoxal (MG). MG treatment did not affect the AKR1C levels in the resistant cells (lower panel). (F), Bar diagram illustrating that that MG pretreatment (1  $\mu$ M) induced a melphalan-resistant phenotype in the parental RPMI8226 cells similar to that of the resistant LR5 cells.

doi:10.1371/journal.pone.0119857.g005

aerobic glycolysis of the melphalan-resistant cells is also supported by the selective effect of the electron transport chain inhibitors metformin and antimycin A, which target the NAD<sup>+</sup>-generating steps. Metformin is well tolerated and widely used in the treatment of diabetes, and it has been shown to suppress breast and pancreatic tumor development and reprogram ovarian and breast cancer cells to a non-cancerous state [59–63]; however, the molecular mechanisms by which metformin displays an anti-cancer effect and is selectively cytotoxic to melphalan-resistant myeloma cells require further study.

Both IL-8 and VEGF are important mediators of hypoxia and oxidative stress signaling that stimulate proliferation and survival of MM cells [64]. In addition, IL-8 is a potent pro-inflammatory cytokine. Downstream signaling involves complex kinase networks including MAPKs, PI3Ks and PKC [36]. The two PI3K inhibitors LY294002 and wortmannin were selectively cytotoxic to the melphalan-resistant cells. LY294002 broadly targets PI3Ks and has been shown to inhibit CK2, mTOR and GSK3B [65], while wortmannin targets PI3K-C2 $\beta$  and weakly inhibits mTOR and DNA-PK [66,67]. The highly specific mTOR-inhibitor rapamycin was also selectively cytotoxic to the resistant cells. Rapamycin inhibits mTORC1 and may also inhibit mTORC2 in some cell types [68]. In the melphalan-resistant cells, mTOR signaling is apparently not AKT dependent, since AKT1- and pAKT1-levels were both reduced. Moreover, PTEN, which negatively regulates AKT, was more than twofold up-regulated at the mRNA level in the resistant cells. AKT1-independent activation of mTOR has been reported in several cell types, including B-lymphocyte cell lines [69] and follicular lymphoma cells [70]. In the tumor syndrome tuberous sclerosis (TSC) mTOR is indirectly activated by MAPK-mediated phosphorylation of TSC1 and 2 that alleviates inhibition of mTOR [71]. Notably we find that both TSC1 and 2 are significantly down-regulated at the mRNA level in the resistant cells (S2 Table), potentially contributing to increased functional mTOR. Recent studies have assigned a central role of mTOR2C in the control of metabolic reprogramming in cancer cells. This function is AKT-independent and rather involves up-regulation of c-MYC [72,73], which was found to be 1.8-fold up-regulated at the mRNA level in the resistant cells. In addition, the glucocorticoid-stimulated kinase SGK1, which is a downstream target of mTORC2 and an important mediator of AKT-independent mTOR signaling [74] was fourfold up-regulated at the mRNA level in the melphalan-resistant cells (S2 Table).

The p38MAPK inhibitors SB203580 and BIRB796 were both differently cytotoxic to the cell lines. These inhibitors also exhibit different specificities, with SB203580 inhibiting p38 $\alpha$  and  $\beta$ , as well as CK1, GSK3, RIP2 and GAK, while BIRB796 inhibits p38 $\alpha$ ,  $\beta$ ,  $\gamma$  and  $\delta$  as well as JNK2. The overlapping specificities of the inhibitors as well as the inherent complexity and crosstalk between the various signaling pathways renders elucidation of the exact mechanisms involved to be extremely challenging; however, the selective cytotoxicity of BIRB796 towards the melphalan-resistant cells warrant further investigation into the involvement of JNK2 in melphalan resistance. JNK2 has a central role in stress signaling, including oxidative stress, and also mediates secretion of pro-inflammatory IL-8, thus potentially forming an autocrine stimulatory loop in the melphalan-resistant cells.

The involvement of AKR1C enzymes in melphalan resistance was substantiated by inhibitor studies as well as the ability of methyl glyoxal-induced AKR1C3 to induce melphalan-resistance in the parental RPMI8226 cells. The AKR1C subfamily plays essential roles in the metabolism of steroid hormones and bile acids, and is involved in the pre-receptor regulation of nuclear

and membrane-bound receptors [75]. Dysregulated AKR1C2 and C3 expression has been linked to the development of prostate, breast and endometrial carcinomas as well as leukemias, likely due to their ability to modify steroid hormones and prostaglandins (PDGs) [75]. Moreover, AKR1C3 has been identified as a potential therapeutic target in leukemia because its PGD2 reductase activity may prevent cell differentiation [76]. This activity also prevents formation of the pro-apoptotic 15-deoxy-PGJ2 [77]. In a recent drug screen to identify specific AKR1C3 inhibitors, tetracycline was initially identified as a potential AKR1C3-selective inhibitor. However subsequent analysis by mass spectrometry and NMR revealed that the active inhibitor was a breakdown product of tetracycline, (4-methyl(de-dimethylamine)-tetracycline (4-MDDT). Treatment of leukemia cells with 4-MDDT did not recapitulate the anti-leukemic property of pan-AKR1C inhibitors, suggesting that multiple AKR1C inhibition is likely required to elicit an anticancer effect in leukemia [78], in agreement with our findings. In addition to endogenous substrates, AKR1C enzymes have been implicated in the metabolism of several exogenous substrates, including drugs, carcinogens and reactive aldehydes such as 4-hydroxynonenal (4HNE) [49]. AKR1C1–3 has been shown to possess a high specific activity for 4HNE reduction [51], one of the most cytotoxic products of lipid peroxidation that is likely formed by melphalan-induced cellular peroxide [79] and increased plasma lipid peroxidation. A potential role of AKR1C1–3 in melphalan resistance could thus be a result of 4HNE processing. Although currently speculative, the AKR1C enzymes might also have a more subtle role in regulating the redox balance of cells under oxidative stress. They act primarily as reductases *in vivo*, ( $K_d$  for NADPH in the nanomolar range) and could potentially contribute to influence the NADPH/NADP<sup>+</sup> balance. Since NADPH potently inhibits NAD<sup>+</sup>-dependent oxidation reactions at low  $\mu$ M concentrations, such regulation could ensure sufficient NAD<sup>+</sup> to allow active glycolytic ATP-generation in the melphalan-resistant cells.

## Conclusions

Our results reveal the presence of several previously unrecognized mechanisms for acquired drug resistance against melphalan. The SILAC profiling approach identified a switch in metabolism towards aerobic glycolysis as well as modulated oxidative stress signaling in the resistant cells. The metabolic switch was not evident from the mRNA results alone and underscores the power of quantitative proteomic profiling to identify alterations in biological pathways under significant translational control, such as metabolic pathways during chronic stress [80]. The present in-depth analysis of a melphalan-sensitive cell line and its resistant derivative highlights several promising targets within metabolic and oxidative stress response pathways that should be further explored to overcome melphalan resistance in MM. Such studies are now in progress in our laboratory.

## Supporting Information

**S1 Table. Expression levels of proteins in melphalan-resistant and-sensitive RPMI8226 cells as quantified by SILAC.**

(TXT)

**S2 Table. Differentially expressed mRNAs in melphalan-resistant and-sensitive RPMI8226 cells as determined from Illumina analysis.**

(CSV)

## Acknowledgments

The Illumina microarray work was provided by the Genomics Core Facility (GCF), Norwegian University of Science and Technology (NTNU).

## Author Contributions

Conceived and designed the experiments: KAZ MMLS A. Sarno ONJ GS. Performed the experiments: KAZ MMLS A. Sarno AD SR CY PAA IE. Analyzed the data: KAZ MMLS A. Sarno A. Sharma A. Sundan GS. Contributed reagents/materials/analysis tools: KAZ MMLS A. Sarno A. Sharma A. Sundan CY PAA GS. Wrote the paper: KAZ MMLS A. Sarno GS.

## References

1. Raab MS, Podar K, Breitkreutz I, Richardson PG, Anderson KC (2009) Multiple myeloma. *Lancet* 374;9686: 324–339. doi: [10.1016/S0140-6736\(09\)60221-X](https://doi.org/10.1016/S0140-6736(09)60221-X) PMID: [19541364](https://pubmed.ncbi.nlm.nih.gov/19541364/)
2. Lonial S, Cavenagh J (2009) Emerging combination treatment strategies containing novel agents in newly diagnosed multiple myeloma. *Br J Haematol* 145;6: 681–708. doi: [10.1111/j.1365-2141.2009.07649.x](https://doi.org/10.1111/j.1365-2141.2009.07649.x) PMID: [19344388](https://pubmed.ncbi.nlm.nih.gov/19344388/)
3. Kyle RA, Rajkumar SV (2009) Treatment of multiple myeloma: a comprehensive review. *Clin Lymphoma Myeloma* 9;4: 278–288. doi: [10.3816/CLM.2009.n.056](https://doi.org/10.3816/CLM.2009.n.056) PMID: [19717377](https://pubmed.ncbi.nlm.nih.gov/19717377/)
4. Povirk LF, Shuker DE (1994) DNA damage and mutagenesis induced by nitrogen mustards. *Mutat Res* 318;3: 205–226. PMID: [7527485](https://pubmed.ncbi.nlm.nih.gov/7527485/)
5. Mohamed D, Linscheid M (2008) Separation and identification of trinucleotide-melphalan adducts from enzymatically digested DNA using HPLC-ESI-MS. *Anal Bioanal Chem* 392;5: 805–817. doi: [10.1007/s00216-008-2236-0](https://doi.org/10.1007/s00216-008-2236-0) PMID: [18622599](https://pubmed.ncbi.nlm.nih.gov/18622599/)
6. Ahmed AE, Hsu TF, el-Azhary RA, Moawad H, Farrish HH Jr, et al. (1982) Tissue distribution and macromolecular interactions of <sup>14</sup>C-ring melphalan in the rat. *Cancer Chemother Pharmacol* 8;3: 271–276. PMID: [7127659](https://pubmed.ncbi.nlm.nih.gov/7127659/)
7. Homolya L, Varadi A, Sarkadi B (2003) Multidrug resistance-associated proteins: Export pumps for conjugates with glutathione, glucuronate or sulfate. *Biofactors* 17;1–4: 103–114. PMID: [12897453](https://pubmed.ncbi.nlm.nih.gov/12897453/)
8. Bellamy WT, Dalton WS, Gleason MC, Grogan TM, Trent JM (1991) Development and characterization of a melphalan-resistant human multiple myeloma cell line. *Cancer Res* 51;3: 995–1002. PMID: [1988143](https://pubmed.ncbi.nlm.nih.gov/1988143/)
9. Rothbarth J, Vahrmeijer AL, Mulder GJ (2002) Modulation of cytostatic efficacy of melphalan by glutathione: mechanisms and efficacy. *Chem Biol Interact* 140;2: 93–107. PMID: [12076518](https://pubmed.ncbi.nlm.nih.gov/12076518/)
10. Spanswick VJ, Craddock C, Sekhar M, Mahendra P, Shankaranarayana P, et al. (2002) Repair of DNA interstrand crosslinks as a mechanism of clinical resistance to melphalan in multiple myeloma. *Blood* 100;1: 224–229. PMID: [12070031](https://pubmed.ncbi.nlm.nih.gov/12070031/)
11. Chen Q, Van der Sluis PC, Boulware D, Hazlehurst LA, Dalton WS (2005) The FA/BRCA pathway is involved in melphalan-induced DNA interstrand cross-link repair and accounts for melphalan resistance in multiple myeloma cells. *Blood* 106;2: 698–705. PMID: [15802532](https://pubmed.ncbi.nlm.nih.gov/15802532/)
12. Yarde DN, Oliveira V, Mathews L, Wang X, Villagra A, et al. (2009) Targeting the Fanconi anemia/BRCA pathway circumvents drug resistance in multiple myeloma. *Cancer Res* 69;24: 9367–9375. doi: [10.1158/0008-5472.CAN-09-2616](https://doi.org/10.1158/0008-5472.CAN-09-2616) PMID: [19934314](https://pubmed.ncbi.nlm.nih.gov/19934314/)
13. Sousa MM, Zub KA, Aas PA, Hanssen-Bauer A, Demirovic A, et al. (2013) An inverse switch in DNA base excision and strand break repair contributes to melphalan resistance in multiple myeloma cells. *PLOS ONE* 8;2: e55493. doi: [10.1371/journal.pone.0055493](https://doi.org/10.1371/journal.pone.0055493) PMID: [23405159](https://pubmed.ncbi.nlm.nih.gov/23405159/)
14. Xie J, Zhang L, Li M, Du J, Zhou L, et al. (2014) Functional analysis of the involvement of apurinic/apyrimidinic endonuclease 1 in the resistance to melphalan in multiple myeloma. *BMC Cancer* 14;1: 11.
15. Das GC, Bacsi A, Shrivastav M, Hazra TK, Boldogh I (2006) Enhanced gamma-glutamylcysteine synthetase activity decreases drug-induced oxidative stress levels and cytotoxicity. *Mol Carcinog* 45;9: 635–647. PMID: [16491484](https://pubmed.ncbi.nlm.nih.gov/16491484/)
16. Oancea M, Mani A, Hussein MA, Almasan A (2004) Apoptosis of multiple myeloma. *Int J Hematol* 80;3: 224–231. PMID: [15540896](https://pubmed.ncbi.nlm.nih.gov/15540896/)
17. Gentleman RC, Carey VJ, Bates DM, Bolstad B, Dettling M, et al. (2004) Bioconductor: open software development for computational biology and bioinformatics. *Genome Biol* 5;10: R80. PMID: [15461798](https://pubmed.ncbi.nlm.nih.gov/15461798/)

18. Smyth GK (2004) Linear models and empirical bayes methods for assessing differential expression in microarray experiments. *Stat Appl Genet Mol Biol* 3: Article3. PMID: [16646809](#)
19. NCBI Gene Expression Omnibus. Available: <http://www.ncbi.nlm.nih.gov/geo/query/acc.cgi?acc=GSE60970>. Accessed 2015 Feb 5.
20. Shevchenko A, Wilm M, Vorm O, Mann M (1996) Mass spectrometric sequencing of proteins silver-stained polyacrylamide gels. *Anal Chem* 68;5: 850–858. PMID: [8779443](#)
21. Vizcaino JA, Deutsch EW, Wang R, Csordas A, Reisinger F, et al. (2014) ProteomeXchange provides globally coordinated proteomics data submission and dissemination. *Nat Biotechnol* 32;3: 223–226. doi: [10.1038/nbt.2839](https://doi.org/10.1038/nbt.2839) PMID: [24727771](#)
22. EMBL-EBI PRIDE Database. Available: <http://www.ebi.ac.uk/pride/archive/projects/PXD001276>. Accessed 2015 Feb 5.
23. Warburg O (1956) On the origin of cancer cells. *Science* 123;3191: 309–314. PMID: [13298683](#)
24. Upadhyay M, Samal J, Kandpal M, Singh OV, Vivekanandan P (2013) The Warburg effect: insights from the past decade. *Pharmacol Ther* 137;3: 318–330. doi: [10.1016/j.pharmthera.2012.11.003](https://doi.org/10.1016/j.pharmthera.2012.11.003) PMID: [23159371](#)
25. Plas DR, Thompson CB (2002) Cell metabolism in the regulation of programmed cell death. *Trends Endocrinol Metab* 13;2: 75–78. PMID: [11854022](#)
26. DeBerardinis RJ (2008) Is cancer a disease of abnormal cellular metabolism? New angles on an old idea. *Genet Med* 10;11: 767–777. doi: [10.1097/GIM.0b013e31818b0d9b](https://doi.org/10.1097/GIM.0b013e31818b0d9b) PMID: [18941420](#)
27. Dang CV, Le A, Gao P (2009) MYC-induced cancer cell energy metabolism and therapeutic opportunities. *Clin Cancer Res* 15;21: 6479–6483. doi: [10.1158/1078-0432.CCR-09-0889](https://doi.org/10.1158/1078-0432.CCR-09-0889) PMID: [19861459](#)
28. Wu M, Neilson A, Swift AL, Moran R, Tamagnine J, et al. (2007) Multiparameter metabolic analysis reveals a close link between attenuated mitochondrial bioenergetic function and enhanced glycolysis dependency in human tumor cells. *Am J Physiol Cell Physiol* 292;1: C125–136. PMID: [16971499](#)
29. Niewisch MR, Kuci Z, Wolburg H, Sautter M, Krampen L, et al. (2012) Influence of dichloroacetate (DCA) on lactate production and oxygen consumption in neuroblastoma cells: is DCA a suitable drug for neuroblastoma therapy? *Cell Physiol Biochem* 29;3–4: 373–380.
30. Dowell JA, Johnson JA (2013) Mechanisms of Nrf2 protection in astrocytes as identified by quantitative proteomics and siRNA screening. *PLOS ONE* 8;7: e70163. doi: [10.1371/journal.pone.0070163](https://doi.org/10.1371/journal.pone.0070163) PMID: [23922950](#)
31. Halestrap AP, Meredith D (2004) The SLC16 gene family—from monocarboxylate transporters (MCTs) to aromatic amino acid transporters and beyond. *Pflugers Arch* 447;5: 619–628. PMID: [12739169](#)
32. Pizzuto R, Paventi G, Porcile C, Sarnataro D, Daniele A, et al. (2012) L-Lactate metabolism in HEP G2 cell mitochondria due to the L-lactate dehydrogenase determines the occurrence of the lactate/pyruvate shuttle and the appearance of oxaloacetate, malate and citrate outside mitochondria. *Biochim Biophys Acta* 1817;9: 1679–1690. doi: [10.1016/j.bbabi.2012.05.010](https://doi.org/10.1016/j.bbabi.2012.05.010) PMID: [22659615](#)
33. Brooks GA, Dubouchaud H, Brown M, Sicurello JP, Butz CE (1999) Role of mitochondrial lactate dehydrogenase and lactate oxidation in the intracellular lactate shuttle. *Proc Natl Acad Sci U S A* 96;3: 1129–1134. PMID: [9927705](#)
34. Vegran F, Boidot R, Michiels C, Sonveaux P, Feron O (2011) Lactate influx through the endothelial cell monocarboxylate transporter MCT1 supports an NF-kappaB/IL-8 pathway that drives tumor angiogenesis. *Cancer Res* 71;7: 2550–2560. doi: [10.1158/0008-5472.CAN-10-2828](https://doi.org/10.1158/0008-5472.CAN-10-2828) PMID: [21300765](#)
35. Kim HS, Lee HE, Yang HK, Kim WH (2013) High Lactate Dehydrogenase 5 Expression Correlates with High Tumoral and Stromal Vascular Endothelial Growth Factor Expression in Gastric Cancer. *Pathobiology* 81;2: 78–85. doi: [10.1159/000357017](https://doi.org/10.1159/000357017) PMID: [24401755](#)
36. Waugh DJ, Wilson C (2008) The interleukin-8 pathway in cancer. *Clin Cancer Res* 14;21: 6735–6741. doi: [10.1158/1078-0432.CCR-07-4843](https://doi.org/10.1158/1078-0432.CCR-07-4843) PMID: [18980965](#)
37. Page BD, Croucher DC, Li ZH, Haftchenary S, Jimenez-Zepeda VH, et al. (2013) Inhibiting aberrant signal transducer and activator of transcription protein activation with tetrapodal, small molecule Src homology 2 domain binders: promising agents against multiple myeloma. *J Med Chem* 56;18: 7190–7200. doi: [10.1021/jm3017255](https://doi.org/10.1021/jm3017255) PMID: [23968501](#)
38. Shi Y, Yan H, Frost P, Gera J, Lichtenstein A (2005) Mammalian target of rapamycin inhibitors activate the AKT kinase in multiple myeloma cells by up-regulating the insulin-like growth factor receptor/insulin receptor substrate-1/phosphatidylinositol 3-kinase cascade. *Mol Cancer Ther* 4;10: 1533–1540. PMID: [16227402](#)
39. Kuma Y, Sabio G, Bain J, Shpiro N, Marquez R, et al. (2005) BIRB796 inhibits all p38 MAPK isoforms in vitro and in vivo. *J Biol Chem* 280;20: 19472–19479. PMID: [15755732](#)



40. Penning TM (2014) The Aldo-keto reductases (AKRs): Overview. *Chem Biol Interact.* pii: S0009-2797 (14:)00273–7.
41. Penning TM, Drury JE (2007) Human Aldo-keto reductases: Function, gene regulation, and single nucleotide polymorphisms. *Arch Biochem Biophys* 464;2: 241–250. PMID: [17537398](#)
42. Chi Y, Li K, Yan Q, Koizumi S, Shi L, et al. (2011) Nonsteroidal anti-inflammatory drug flufenamic acid is a potent activator of AMP-activated protein kinase. *J Pharmacol Exp Ther* 339;1: 257–266. doi: [10.1124/jpet.111.183020](#) PMID: [21765041](#)
43. Byrns MC, Penning TM (2009) Type 5 17beta-hydroxysteroid dehydrogenase/prostaglandin F synthase (AKR1C3): role in breast cancer and inhibition by non-steroidal anti-inflammatory drug analogs. *Chem Biol Interact* 178:1–3: 221–227.
44. Bauman DR, Rudnick SI, Szewczuk LM, Jin Y, Gopishetty S, et al. (2005) Development of nonsteroidal anti-inflammatory drug analogs and steroid carboxylates selective for human Aldo-keto reductase isoforms: potential antineoplastic agents that work independently of cyclooxygenase isozymes. *Mol Pharmacol* 67;1: 60–68. PMID: [15475569](#)
45. Ouellet M, Falguyret JP, Percival MD (2004) Detergents profoundly affect inhibitor potencies against both cyclo-oxygenase isoforms. *Biochem J* 377;Pt3: 675–684. PMID: [14510637](#)
46. Ding J, Tsuboi K, Hoshikawa H, Goto R, Mori N, et al. (2006) Cyclooxygenase isozymes are expressed in human myeloma cells but not involved in anti-proliferative effect of cyclooxygenase inhibitors. *Mol Carcinog* 45;4: 250–259. PMID: [16385588](#)
47. Saeki T, Yui S, Hirai T, Fujii T, Okada S, et al. (2012) Ursodeoxycholic acid protects colon cancer HCT116 cells from deoxycholic acid-induced apoptosis by inhibiting apoptosome formation. *Nutr Cancer* 64;4: 617–626. doi: [10.1080/01635581.2012.669876](#) PMID: [22497644](#)
48. Ikegami T, Matsuzaki Y, Al Rashid M, Ceryak S, Zhang Y, et al. (2006) Enhancement of DNA topoisomerase I inhibitor-induced apoptosis by ursodeoxycholic acid. *Mol Cancer Ther* 5;1: 68–79. PMID: [16432164](#)
49. Lyon RC, Li D, McGarvie G, Ellis EM (2013) Aldo-keto reductases mediate constitutive and inducible protection against aldehyde toxicity in human neuroblastoma SH-SY5Y cells. *Neurochem Int* 62;1: 113–121. doi: [10.1016/j.neuint.2012.10.007](#) PMID: [23084985](#)
50. Reed TT (2011) Lipid peroxidation and neurodegenerative disease. *Free Radic Biol Med* 51;7: 1302–1319. doi: [10.1016/j.freeradbiomed.2011.06.027](#) PMID: [21782935](#)
51. Burczynski ME, Sridhar GR, Palackal NT, Penning TM (2001) The reactive oxygen species—and Michael acceptor-inducible human Aldo-keto reductase AKR1C1 reduces the alpha,beta-unsaturated aldehyde 4-hydroxy-2-nonenal to 1,4-dihydroxy-2-nonene. *J Biol Chem* 276;4: 2890–2897. PMID: [11060293](#)
52. Zhao Y, Butler EB, Tan M (2013) Targeting cellular metabolism to improve cancer therapeutics. *Cell Death Dis* 4: e532. doi: [10.1038/cddis.2013.60](#) PMID: [23470539](#)
53. Raez LE, Papadopoulos K, Ricart AD, Chiorean EG, Dipaola RS, et al. (2013) A phase I dose-escalation trial of 2-deoxy-D-glucose alone or combined with docetaxel in patients with advanced solid tumors. *Cancer Chemother Pharmacol* 71;2: 523–530. doi: [10.1007/s00280-012-2045-1](#) PMID: [23228990](#)
54. Sanchez WY, McGee SL, Connor T, Mottram B, Wilkinson A, et al. (2013) Dichloroacetate inhibits aerobic glycolysis in multiple myeloma cells and increases sensitivity to bortezomib. *Br J Cancer* 108;8: 1624–1633. doi: [10.1038/bjc.2013.120](#) PMID: [23531700](#)
55. Ling YH, Liebes L, Zou Y, Perez-Soler R (2003) Reactive oxygen species generation and mitochondrial dysfunction in the apoptotic response to Bortezomib, a novel proteasome inhibitor, in human H460 non-small cell lung cancer cells. *J Biol Chem* 278;36: 33714–33723. PMID: [12821677](#)
56. Kluza J, Corazao-Rozas P, Touil Y, Jendoubi M, Maire C, et al. (2012) Inactivation of the HIF-1alpha/PDK3 signaling axis drives melanoma toward mitochondrial oxidative metabolism and potentiates the therapeutic activity of pro-oxidants. *Cancer Res* 72;19: 5035–5047. doi: [10.1158/0008-5472.CAN-12-0979](#) PMID: [22865452](#)
57. Sharaf el dein O, Gallerne C, Brenner C, Lemaire C (2012) Increased expression of VDAC1 sensitizes carcinoma cells to apoptosis induced by DNA cross-linking agents. *Biochem Pharmacol* 83;9: 1172–1182. doi: [10.1016/j.bcp.2012.01.017](#) PMID: [22285227](#)
58. Verrax J, Dejeans N, Sid B, Glorieux C, Calderon PB (2011) Intracellular ATP levels determine cell death fate of cancer cells exposed to both standard and redox chemotherapeutic agents. *Biochem Pharmacol* 82;11: 1540–1548. doi: [10.1016/j.bcp.2011.07.102](#) PMID: [21843513](#)
59. Decensi A, Puntoni M, Goodwin P, Cazzaniga M, Gennari A, et al. (2010) Metformin and cancer risk in diabetic patients: a systematic review and meta-analysis. *Cancer Prev Res (Phila)* 3;11: 1451–1461. doi: [10.1158/1940-6207.CAPR-10-0157](#) PMID: [20947488](#)

60. Currie CJ, Poole CD, Jenkins-Jones S, Gale EA, Johnson JA, et al. (2012) Mortality after incident cancer in people with and without type 2 diabetes: impact of metformin on survival. *Diabetes Care* 35;2: 299–304. doi: [10.2337/dc11-1313](https://doi.org/10.2337/dc11-1313) PMID: [22266734](https://pubmed.ncbi.nlm.nih.gov/22266734/)
61. Anisimov VN, Berstein LM, Egormin PA, Piskunova TS, Popovich IG, et al. (2005) Effect of metformin on life span and on the development of spontaneous mammary tumors in HER-2/neu transgenic mice. *Exp Gerontol* 40;8–9: 685–693. PMID: [16243468](https://pubmed.ncbi.nlm.nih.gov/16243468/)
62. Schneider MB, Matsuzaki H, Haorah J, Ulrich A, Standop J, et al. (2001) Prevention of pancreatic cancer induction in hamsters by metformin. *Gastroenterology* 120;5: 1263–1270. PMID: [11266389](https://pubmed.ncbi.nlm.nih.gov/11266389/)
63. Hu T, Chung YM, Guan M, Ma M, Ma J, et al. (2014) Reprogramming ovarian and breast cancer cells into non-cancerous cells by low-dose metformin or SN-38 through FOXO3 activation. *Sci Rep* 4: 5810. doi: [10.1038/srep05810](https://doi.org/10.1038/srep05810) PMID: [25056111](https://pubmed.ncbi.nlm.nih.gov/25056111/)
64. Podar K, Anderson KC (2005) The pathophysiologic role of VEGF in hematologic malignancies: therapeutic implications. *Blood* 105;4: 1383–1395. PMID: [15471951](https://pubmed.ncbi.nlm.nih.gov/15471951/)
65. Gharbi SI, Zvelebil MJ, Shuttleworth SJ, Hancox T, Saghir N, et al. (2007) Exploring the specificity of the PI3K family inhibitor LY294002. *Biochem J* 404;1: 15–21. PMID: [17302559](https://pubmed.ncbi.nlm.nih.gov/17302559/)
66. Hartley KO, Gell D, Smith GC, Zhang H, Divecha N, et al. (1995) DNA-dependent protein kinase catalytic subunit: a relative of phosphatidylinositol 3-kinase and the ataxia telangiectasia gene product. *Cell* 82;5: 849–856. PMID: [7671312](https://pubmed.ncbi.nlm.nih.gov/7671312/)
67. Brunn GJ, Hudson CC, Sekulic A, Williams JM, Hosoi H, et al. (1997) Phosphorylation of the translational repressor PHAS-I by the mammalian target of rapamycin. *Science* 277;5322: 99–101. PMID: [9204908](https://pubmed.ncbi.nlm.nih.gov/9204908/)
68. Sarbassov DD, Ali SM, Sengupta S, Sheen JH, Hsu PP, et al. (2006) Prolonged rapamycin treatment inhibits mTORC2 assembly and Akt/PKB. *Mol Cell* 22;2: 159–168. PMID: [16603397](https://pubmed.ncbi.nlm.nih.gov/16603397/)
69. Wlodarski P, Kasprzycka M, Liu X, Marzec M, Robertson ES, et al. (2005) Activation of mammalian target of rapamycin in transformed B lymphocytes is nutrient dependent but independent of Akt, mitogen-activated protein kinase/extracellular signal-regulated kinase kinase, insulin growth factor-I, and serum. *Cancer Res* 65;17: 7800–7808. PMID: [16140948](https://pubmed.ncbi.nlm.nih.gov/16140948/)
70. Leseux L, Hamdi SM, Al Saati T, Capilla F, Recher C, et al. (2006) Syk-dependent mTOR activation in follicular lymphoma cells. *Blood* 108;13: 4156–4162. PMID: [16912221](https://pubmed.ncbi.nlm.nih.gov/16912221/)
71. Ma L, Chen Z, Erdjument-Bromage H, Tempst P, Pandolfi PP (2005) Phosphorylation and functional inactivation of TSC2 by Erk implications for tuberous sclerosis and cancer pathogenesis. *Cell* 121;2: 179–193. PMID: [15851026](https://pubmed.ncbi.nlm.nih.gov/15851026/)
72. Masui K, Tanaka K, Akhavan D, Babic I, Gini B, et al. (2013) mTOR complex 2 controls glycolytic metabolism in glioblastoma through FoxO acetylation and upregulation of c-Myc. *Cell Metab* 18;5: 726–739. doi: [10.1016/j.cmet.2013.09.013](https://doi.org/10.1016/j.cmet.2013.09.013) PMID: [24140020](https://pubmed.ncbi.nlm.nih.gov/24140020/)
73. Masui K, Cavenee WK, Mischel PS (2014) mTORC2 in the center of cancer metabolic reprogramming. *Trends Endocrinol Metab* 25: 364–373. doi: [10.1016/j.tem.2014.04.002](https://doi.org/10.1016/j.tem.2014.04.002) PMID: [24856037](https://pubmed.ncbi.nlm.nih.gov/24856037/)
74. Mori S, Nada S, Kimura H, Tajima S, Takahashi Y, et al. (2014) The mTOR pathway controls cell proliferation by regulating the FoxO3a transcription factor via SGK1 kinase. *PLOS ONE* 9;2: e88891. doi: [10.1371/journal.pone.0088891](https://doi.org/10.1371/journal.pone.0088891) PMID: [24558442](https://pubmed.ncbi.nlm.nih.gov/24558442/)
75. Rizner TL, Penning TM (2014) Role of aldo-keto reductase family 1 (AKR1) enzymes in human steroid metabolism. *Steroids* 79: 49–63. doi: [10.1016/j.steroids.2013.10.012](https://doi.org/10.1016/j.steroids.2013.10.012) PMID: [24189185](https://pubmed.ncbi.nlm.nih.gov/24189185/)
76. Birtwistle J, Hayden RE, Khanim FL, Green RM, Pearce C, et al. (2009) The aldo-keto reductase AKR1C3 contributes to 7,12-dimethylbenz(a)anthracene-3,4-dihydrodiol mediated oxidative DNA damage in myeloid cells: implications for leukemogenesis. *Mutat Res* 662;1–2: 67–74. doi: [10.1016/j.mrfmmm.2008.12.010](https://doi.org/10.1016/j.mrfmmm.2008.12.010) PMID: [19162045](https://pubmed.ncbi.nlm.nih.gov/19162045/)
77. Byrns MC, Duan L, Lee SH, Blair IA, Penning TM (2010) Aldo-keto reductase 1C3 expression in MCF-7 cells reveals roles in steroid hormone and prostaglandin metabolism that may explain its over-expression in breast cancer. *J Steroid Biochem Mol Biol* 118;3: 177–187. doi: [10.1016/j.jsbmb.2009.12.009](https://doi.org/10.1016/j.jsbmb.2009.12.009) PMID: [20036328](https://pubmed.ncbi.nlm.nih.gov/20036328/)
78. Khanim F, Davies N, Velica P, Hayden R, Ride J, et al. (2014) Selective AKR1C3 inhibitors do not recapitulate the anti-leukaemic activities of the pan-AKR1C inhibitor medroxyprogesterone acetate. *Br J Cancer* 110: 1506–1516. doi: [10.1038/bjc.2014.83](https://doi.org/10.1038/bjc.2014.83) PMID: [24569460](https://pubmed.ncbi.nlm.nih.gov/24569460/)
79. Gorman A, McGowan A, Cotter TG (1997) Role of peroxide and superoxide anion during tumour cell apoptosis. *FEBS Lett* 404;1: 27–33. PMID: [9074631](https://pubmed.ncbi.nlm.nih.gov/9074631/)
80. Baird TD, Wek RC (2012) Eukaryotic initiation factor 2 phosphorylation and translational control in metabolism. *Adv Nutr* 3;3: 307–321. doi: [10.3945/an.112.002113](https://doi.org/10.3945/an.112.002113) PMID: [22585904](https://pubmed.ncbi.nlm.nih.gov/22585904/)
